# Supplementary material for: Transient receptor potential channel 6 knockdown prevents apoptosis of renal tubular epithelial cells upon oxidative stress via autophagy activation
Source: PubMed Central journal article supplement (PMC6170481; doi:10.1038/s41419-018-1052-5), 2018-10-03

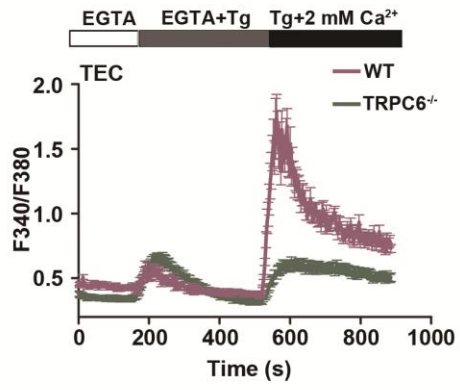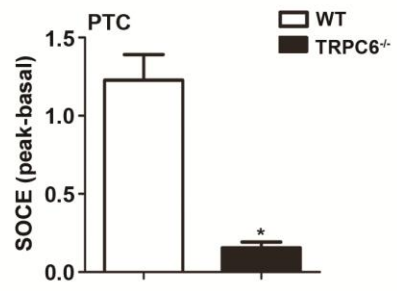

Supplement: 41419_2018_1052_MOESM3_ESM.pdf [file 41419_2018_1052_MOESM3_ESM.pdf]
